# Supplementary material
Source: ML conference proceedings conference paper supplement (https://proceedings.neurips.cc/paper_files/paper/2012/hash/71f6278d140af599e06ad9bf1ba03cb0-Abstract.html)
Supplement: Supplementary file 1 [file 71f6278d140af599e06ad9bf1ba03cb0-Supplemental.zip]

Archive with 1 entries (1 files):
- supplementary.pdf
